# Supplementary figures and images for: The homology of odontodes in gnathostomes: insights from Dlx gene expression in the dogfish, Scyliorhinus canicula
Source: Springer Nature journal article supplement (doi:10.1186/1471-2148-11-307), 2011-10-18

### Scale buds

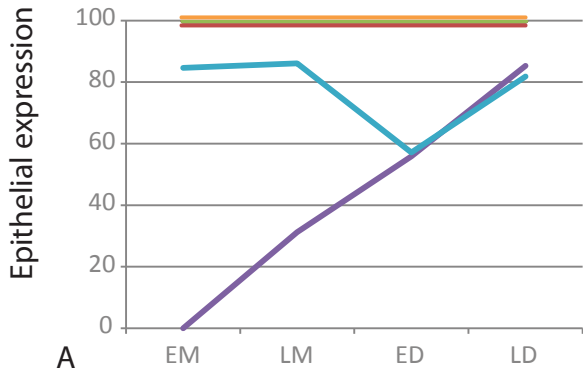

### Tooth buds

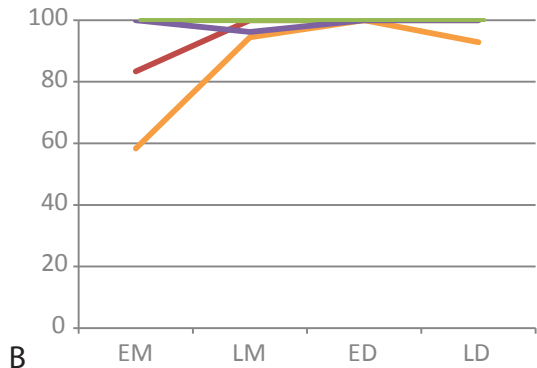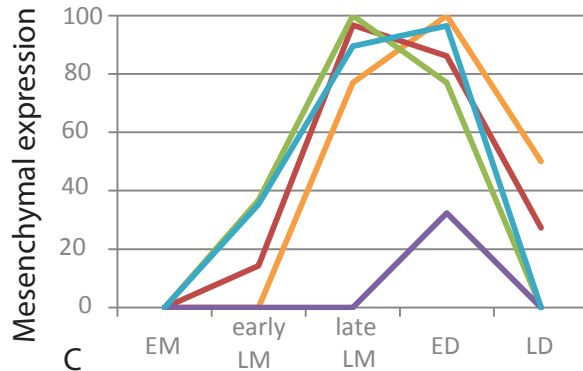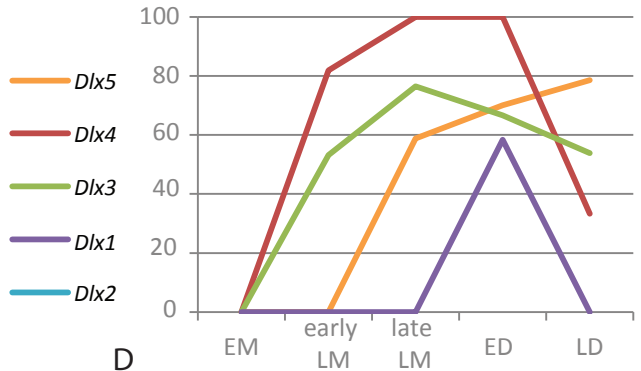

— *Dlx5*  
— *Dlx4*  
— *Dlx3*  
— *Dlx1*  
— *Dlx2*

Supplement: 12862_2011_1917_MOESM10_ESM.pdf [file 12862_2011_1917_MOESM10_ESM.pdf]
